# Supplementary material for: Activated Complement Factors as Disease Markers for Sepsis
Source: PubMed Central journal article supplement (PMC4572436; doi:10.1155/2015/382463), 2015-09-02

# Supplement Figure 1

*a*

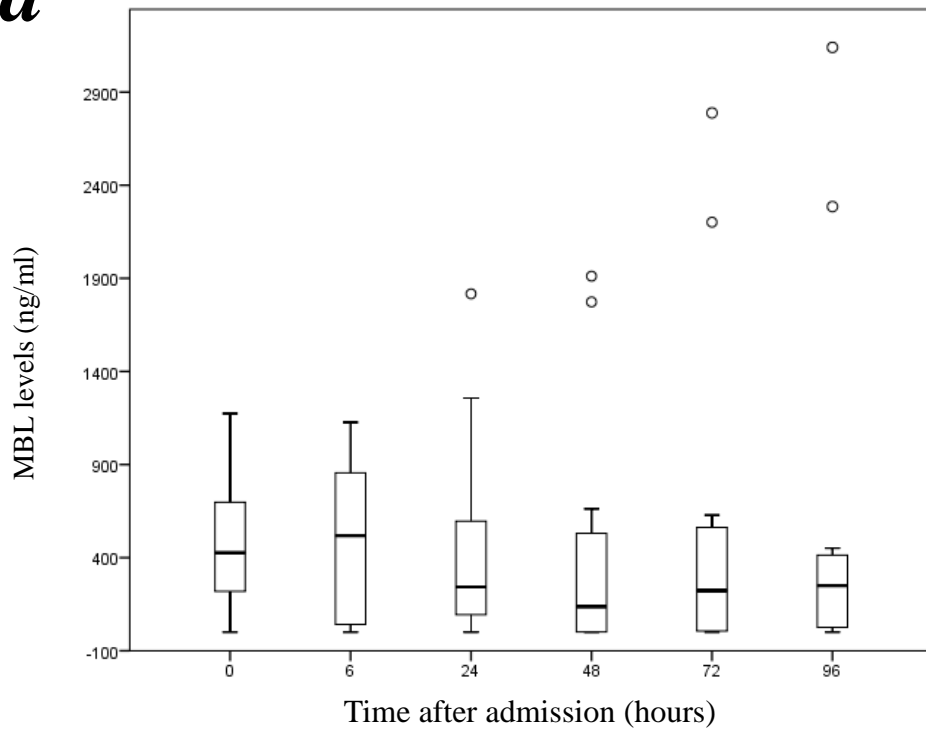

*b*

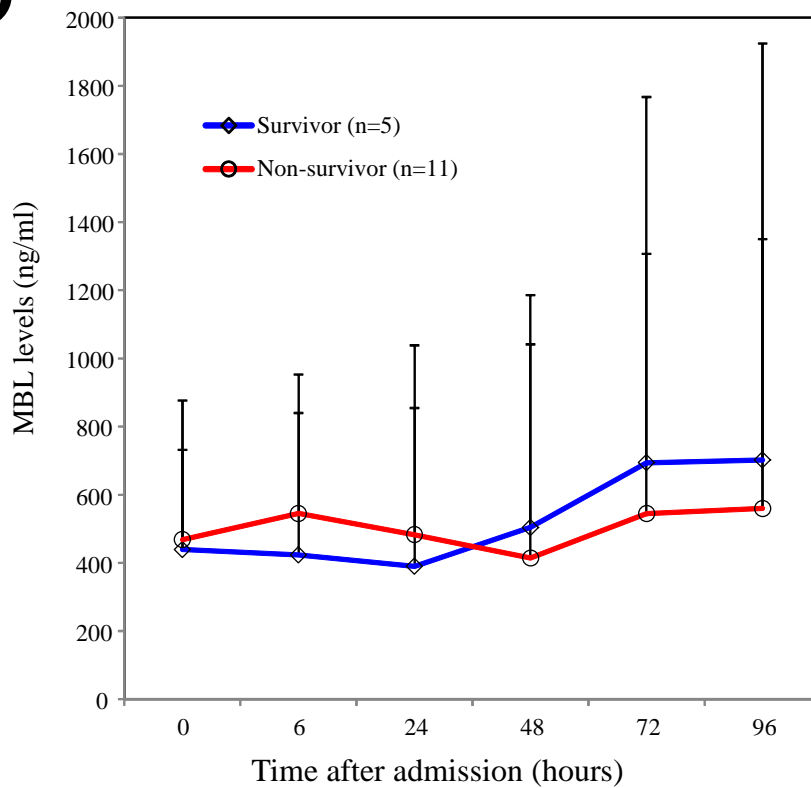

Supplement: 382463.f1.pdf [file 382463.f1.pdf]
